# Supplementary material
Source: PubMed Central journal article supplement (PMC3339649)
Supplement: supp_en.2011-1365_en-11-1365_Suppl_Tabe_4.pdf [file supp_en.2011-1365_en-11-1365_Suppl_Tabe_4.pdf]

**Supplemental Table 4.**  
**Up-regulated genes in the proliferative area of partial thyroidectomized thyroid vs. intact thyroid<sup>1</sup>**

| <b>Genbank</b> | <b>Gene Symbol</b> | <b>Description</b>                                               | <b>Fold Change</b> | <b>p-value<sup>2</sup></b> |
|----------------|--------------------|------------------------------------------------------------------|--------------------|----------------------------|
| NM_029662      | Mfsd2              | major facilitator superfamily domain containing 2                | 2.547466933        | 0.0001                     |
| NM_144860      | Mib1               | mindbomb homolog 1                                               | 2.4223825          | 0.0131                     |
| NM_010779      | Mcpt4              | mast cell protease 4                                             | 2.35909455         | 0.0005                     |
| NM_007529      | Bcan               | brevican                                                         | 2.258720667        | 0.0112                     |
| NM_145927      | Fntb               | farnesyltransferase, CAAX box, beta                              | 2.213885667        | 0.0231                     |
| NM_016974      | Dbp                | D site albumin promoter binding protein                          | 2.1370478          | 0.0274                     |
| NM_010149      | Epor               | erythropoietin receptor                                          | 2.079813667        | 0.0018                     |
| NM_001001182   | Baz2b              | bromodomain adjacent to zinc finger domain, 2B                   | 1.724448267        | 0.0135                     |
| AK032347       | Frmd7              | FERM domain containing 7                                         | 1.669752533        | 0.0041                     |
| AF260925       | Nmnat1             | nicotinamide nucleotide adenyltransferase 1                      | 1.6465104          | 0.0139                     |
| NM_001025572   | Ankrd12            | ankyrin repeat domain 12                                         | 1.623278733        | 0.0263                     |
| NM_025566      | Tnfaip8l1          | tumor necrosis factor, alpha-induced protein 8-like 1            | 1.587914917        | 0.0289                     |
| NM_001024468   | Bcat1              | branched chain aminotransferase 1, cytosolic                     | 1.58205225         | 0.0193                     |
| NM_130859      | Card10             | caspase recruitment domain family, member 10                     | 1.5804634          | 0.0134                     |
| NM_016969      | Myadm              | myeloid-associated differentiation marker                        | 1.561795083        | 0.034                      |
| NM_027769      | Cpne3              | copine III                                                       | 1.557383667        | 0.0153                     |
| NM_010942      | Nsg1               | neuron specific gene family member 1                             | 1.5470056          | 0.0172                     |
| AK036956       | Mpp7               | membrane protein, palmitoylated 7 (MAGUK p55 subfamily member 7) | 1.54085345         | 0.0409                     |
| NM_144945      | Lgi2               | leucine-rich repeat LGI family, member 2                         | 1.502684533        | 0.0323                     |

<sup>1</sup>Only genes with known gene symbols that were up-regulated more than 1.5-fold in log2 scale are listed.
